# Supplementary material for: l-Theanine alleviates heat stress-induced impairment of immune function by regulating the p38 MAPK signalling pathway in mice
Source: Royal Society of Chemistry journal article supplement (doi:10.1039/d2fo02775e), 2022-11-22
Supplement: d2fo02775e1.pdf [file d2fo02775e1.pdf]

**Supplementary Table 1:** Effects of L-theanine on the weight of mice

| Group | Weight/g   |            |            |            |            |            | Weight Changes/g         |                         |
|-------|------------|------------|------------|------------|------------|------------|--------------------------|-------------------------|
|       | 0 d        | 7 d        | 14 d       | 21 d       | 28 d       | 35 d       | A                        | B                       |
| CK    | 22.38±0.45 | 23.41±0.83 | 24.14±1.01 | 24.73±1.22 | 25.34±1.13 | 26.05±1.16 | 0.72±0.51 <sup>a</sup>   | 2.64±0.99 <sup>a</sup>  |
| MOD   | 23.08±1.33 | 23.99±1.68 | 23.84±2.10 | 24.39±2.39 | 25.50±2.49 | 23.63±2.04 | -2.50±0.53 <sup>c</sup>  | -0.36±0.95 <sup>c</sup> |
| S-LLT | 22.90±1.11 | 23.74±0.90 | 24.50±1.48 | 24.62±1.55 | 25.47±1.49 | 23.74±1.23 | -1.85±0.50 <sup>bc</sup> | 0.02±1.19 <sup>bc</sup> |
| S-MLT | 22.78±0.98 | 24.33±1.31 | 25.17±1.36 | 25.38±1.41 | 26.20±1.53 | 23.95±1.22 | -1.94±0.42 <sup>bc</sup> | 0.15±0.48 <sup>bc</sup> |
| S-HLT | 22.74±1.01 | 24.08±1.10 | 24.72±1.43 | 25.38±1.41 | 26.39±1.51 | 24.10±1.13 | -1.97±0.34 <sup>bc</sup> | 0.30±0.76 <sup>bc</sup> |
| L-LLT | 22.79±1.14 | 24.17±1.22 | 24.57±1.13 | 24.97±1.05 | 26.26±1.18 | 24.11±0.92 | -2.01±0.53 <sup>bc</sup> | 0.49±0.98 <sup>bc</sup> |
| L-MLT | 22.91±1.60 | 24.34±1.85 | 24.55±1.65 | 25.29±1.51 | 26.32±1.52 | 24.31±1.28 | -1.48±0.20 <sup>b</sup>  | 1.00±0.44 <sup>b</sup>  |
| L-HLT | 22.81±0.99 | 23.40±1.07 | 24.08±1.13 | 24.82±1.24 | 25.86±1.54 | 24.18±1.51 | -1.85±0.31 <sup>bc</sup> | 0.99±1.03 <sup>b</sup>  |

**Note:** A Changes in weight during the HS; B Increased weight. Data are presented as mean ± SD ( $n = 10$ ). Lowercase letters above the columns in the same group indicate that the one-way ANOVA of the means differs significantly ( $P < 0.05$ ).

**Supplementary Table 2:** Effects of L-theanine on the feed intake of mice

| Group | Feed intake/g |        |        |        |        | Feed intake Changes/g |       |
|-------|---------------|--------|--------|--------|--------|-----------------------|-------|
|       | Week 1        | Week 2 | Week 3 | Week 4 | Week 5 | A                     | B     |
| CK    | 263.4         | 305.9  | 328.1  | 316.7  | 318.9  | 2.20                  | 55.5  |
| MOD   | 277.3         | 258.5  | 258.4  | 266.6  | 223.8  | -42.8                 | -53.5 |
| S-LLT | 232.8         | 288.3  | 249.4  | 270.7  | 230.2  | -40.5                 | -2.6  |
| S-MLT | 269.1         | 265.7  | 252.2  | 275.6  | 235.5  | -40.1                 | -33.6 |
| S-HLT | 325.6         | 267.2  | 256.3  | 267.2  | 229.6  | -37.6                 | -96   |
| L-LLT | 249.2         | 272.5  | 258.0  | 281.1  | 271.4  | -9.7                  | 22.2  |
| L-MLT | 283.3         | 294.4  | 280.5  | 279.6  | 270.6  | -9                    | -12.7 |
| L-HLT | 292.6         | 296.0  | 291.5  | 289.8  | 273.7  | -16.1                 | -18.9 |

**Note:** A Changes in feed intake during the heat stress; B Changes in feed intake during the feeding period.
